# Supplementary material for: Interaction of CuO nanoparticles with plant cells: internalization, oxidative stress, electron transport chain disruption, and toxicogenomic responses
Source: Royal Society of Chemistry journal article supplement (doi:10.1039/c8en00222c), 2018-01-01
Supplement: c8en00222c1.pdf [file c8en00222c1.pdf]

1 **Supplementary Information**

2

3 **Interaction of CuO Nanoparticles with Plant Cells: Internalization, Oxidative**  
4 **stress, Electron Transport Chain Disruption, and Toxicogenomic Responses**

5 Yanhui Dai,<sup>1</sup> Zhenyu Wang,<sup>2,3</sup> Jian Zhao,<sup>1</sup> Lili Xu,<sup>1</sup> Lina Xu,<sup>1</sup> Xiaoyu Yu,<sup>1</sup> Yongpeng Wei,<sup>1</sup>  
6 and Baoshan Xing<sup>\*,4</sup>

7

8 <sup>1</sup> Institute of Costal Environmental Pollution Control, and Ministry of Education Key Laboratory  
9 of Marine Environment and Ecology, Ocean University of China, Qingdao 266100, China

10 <sup>2</sup> Institute of Environmental Processes and Pollution Control, and School of Environmental and  
11 Civil Engineering, Jiangnan University, Wuxi 214122, China

12 <sup>3</sup> Laboratory for Marine Ecology and Environmental Science, Qingdao National Laboratory for  
13 Marine Science and Technology, Qingdao 266071, China

14 <sup>4</sup> Stockbridge School of Agriculture, University of Massachusetts, Amherst, Massachusetts 01003,  
15 United States

16

17 \*Corresponding author

18 Tel.: +1 413 545 5212; fax: +1 413 577 0242

19 *E-mail address:* [bx@umass.edu](mailto:bx@umass.edu) (Dr. Baoshan Xing)

20

21

22

23

24

25

## 26 **Materials and methods**

### 27 **Reactive oxygen species determination**

28 The hydrogen peroxide ( $\text{H}_2\text{O}_2$ ) was detected based on reacting with ammonium  
29 molybdate to produce a peroxomolybdic acid complex.  $\text{H}_2\text{O}_2$  content was performed  
30 using a hydrogen peroxide assay kit (A064, Jiancheng, Nanjing, China). The coefficient  
31 of variation (CV) was 1.7%. Absorbance was determined at 405 nm by a microplate  
32 reader (Thermo, USA).

33 Hydroxyl radical ( $\text{OH}\cdot$ ) was determined using a hydroxyl free radical assay kit (A018,  
34 CV=1.4%, Jiancheng, Nanjing, China) based on the reaction of  $\text{H}_2\text{O}_2$  with Fenton  
35 reaction. A colouration reaction was generated following the addition of the electron  
36 acceptor and Griess reagent. The absorbance was determined using a microplate reader  
37 (Thermo, USA) at 550 nm.

38 Superoxide anion ( $\text{O}_2^{\cdot-}$ ) was determined by inhibition and produce4 produce  
39 superoxide anion assay kit (A052, CV=1.7%, Jiancheng, Nanjing, China).  $\text{O}_2^{\cdot-}$  was  
40 produced by the reaction of xanthine and xanthine oxidase. The solution was colored  
41 after adding the electron acceptor and Griess reagent.

### 42 **Antioxidant enzyme activity, lipid peroxidation and lactate dehydrogenase (LDH)** 43 **determination**

44 Catalase (CAT) was determined based on its ability to scavenge  $\text{H}_2\text{O}_2$  according to  
45 the method of the catalase assay kit (A007-1-1, CV=1.7%, Jiancheng, Nanjing, China).  
46 CAT could catalyze  $\text{H}_2\text{O}_2$ , and the reaction could be ended by adding ammonium  
47 molybdate into the solution. The surplus  $\text{H}_2\text{O}_2$  interacted with ammonium molybdate  
48 to produce a peroxomolybdic acid complex. The absorbance was determined at 405 nm  
49 by a microplate reader (Thermo, USA). One unit of CAT activity was defied as the  
50 amount of enzyme to 1  $\mu\text{mol}$   $\text{H}_2\text{O}_2$  per second. SOD activity was examined by a  
51 superoxide dismutase assay kit (A001-3, CV=1.2%, Jiancheng, Nanjing, China), and  
52 expressed as U/mg protein.

53 Malondialdehyde (MDA) can react with thiobarbituric acid (TBA) to form TBA-  
54 reactive products. Lipid peroxidation in plant cells was assayed as the concentration of  
55 TBA-reactive products at 535 nm, equated with MDA by the level of malondialdehyde

56 (MDA) which was measured by using the lipid peroxidation MDA assay kit (S0131,  
57 Beyotime Biotechnology Institute, Jiangsu, China) following the manufacturer's  
58 protocol.

59 Lactate dehydrogenase (LDH) was performed by using LDH Cytotoxicity Assay Kit  
60 (C0016, Beyotime Institute of Biotechnology, Jiangsu, China). Cells were centrifuged  
61 ( $123 \times g$ , 10 min) after incubation with CuO NPs (12 mg/L), CuO BPs (12 mg/L) or  
62  $\text{Cu}^{2+}$  (0.8 mg/L) for 4 h. The release of LDH in the supernatants was determined by  
63 detecting the absorbance at 490 nm using a microplate reader (Thermo, USA).

64

65

66

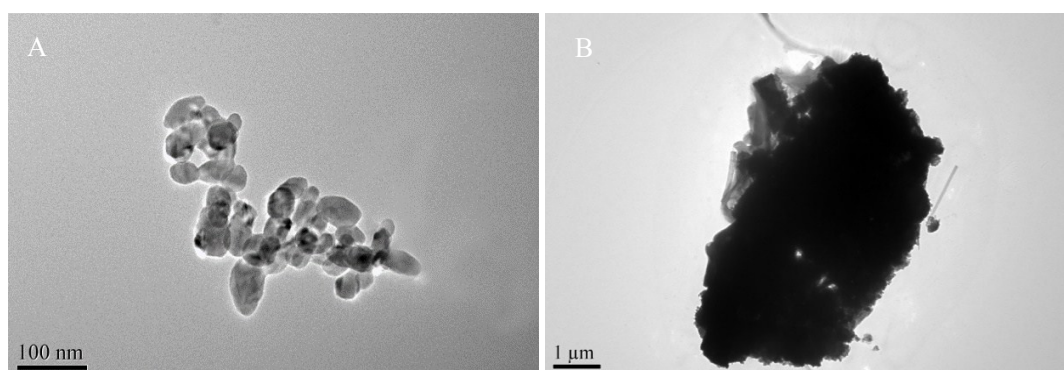

67

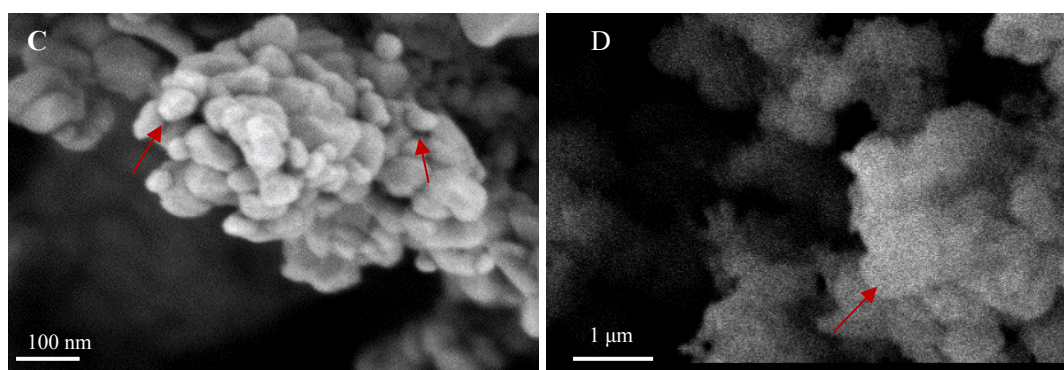

68 Figure S1. TEM and SEM images of CuO NPs and BPs. (A) and (B) were the TEM images of CuO  
69 NPs and BPs, respectively. (C) and (D) were the SEM images of CuO NPs and BPs, respectively.

70

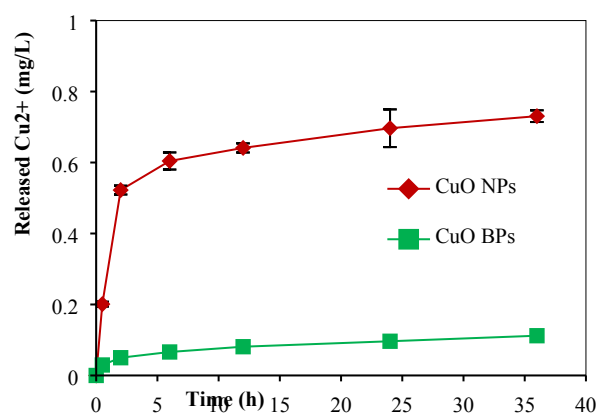

71

72 Figure S2. The dissolution of CuO NPs and CuO BPs as a function of incubation times (0-36 h) in  
73 the modified MS medium (n=3). The concentrations of CuO NPs and BPs were both 12 mg/L.

74

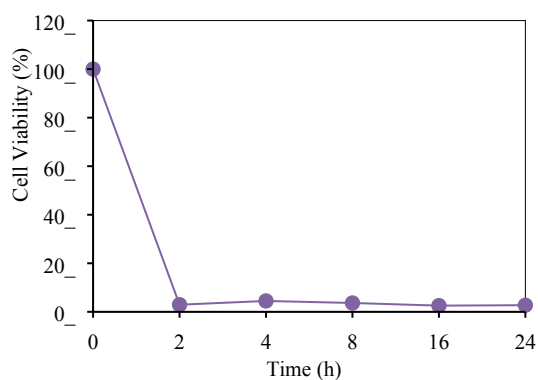

75

76 Figure S3. Cell viability after exposure to  $\text{Cu}^{2+}$  ions (9.6 mg/L, equal Cu content of CuO NPs at 12  
 77 mg/L) as a function of exposure time (0-24 h) (n=3).

78

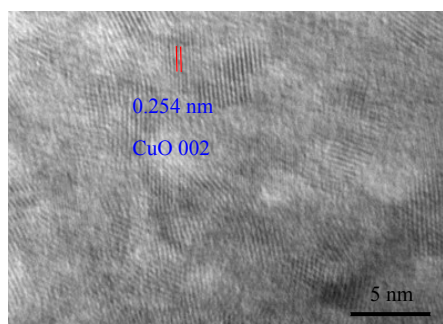

79

80 Figure S4. High resolution TEM (HRTEM) image of intracellular CuO NPs after exposure to CuO  
 81 NPs (12 mg/L) for 12 h. This HRTEM image was the enlarged view of the region as marked with  
 82 blue box in Figure 2B.

83

84

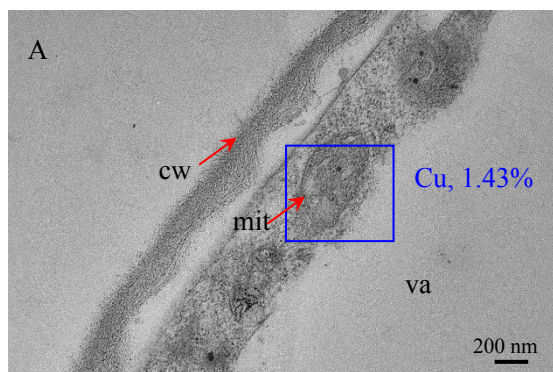

85

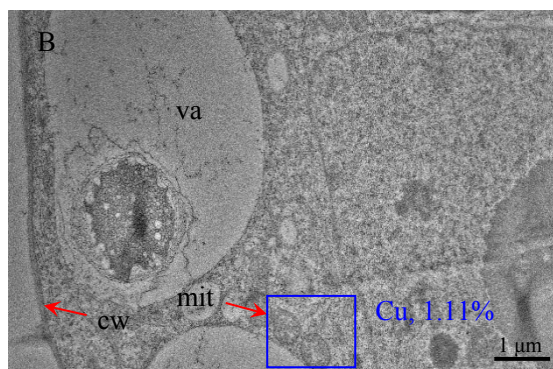

86

87 Figure S5. TEM images of BY-2 cells after exposure to CuO BPs (12 mg/L) (A) and Cu<sup>2+</sup> (0.8  
 88 mg/L) (B) for 12 h. In the two panels, Cu contents marked with blue boxes were analyzed with EDS,  
 89 and the weight percentages of Cu content were shown along with the blue boxes. cw: cell wall; va:  
 90 vacuole; mit: mitochondria.

91

92

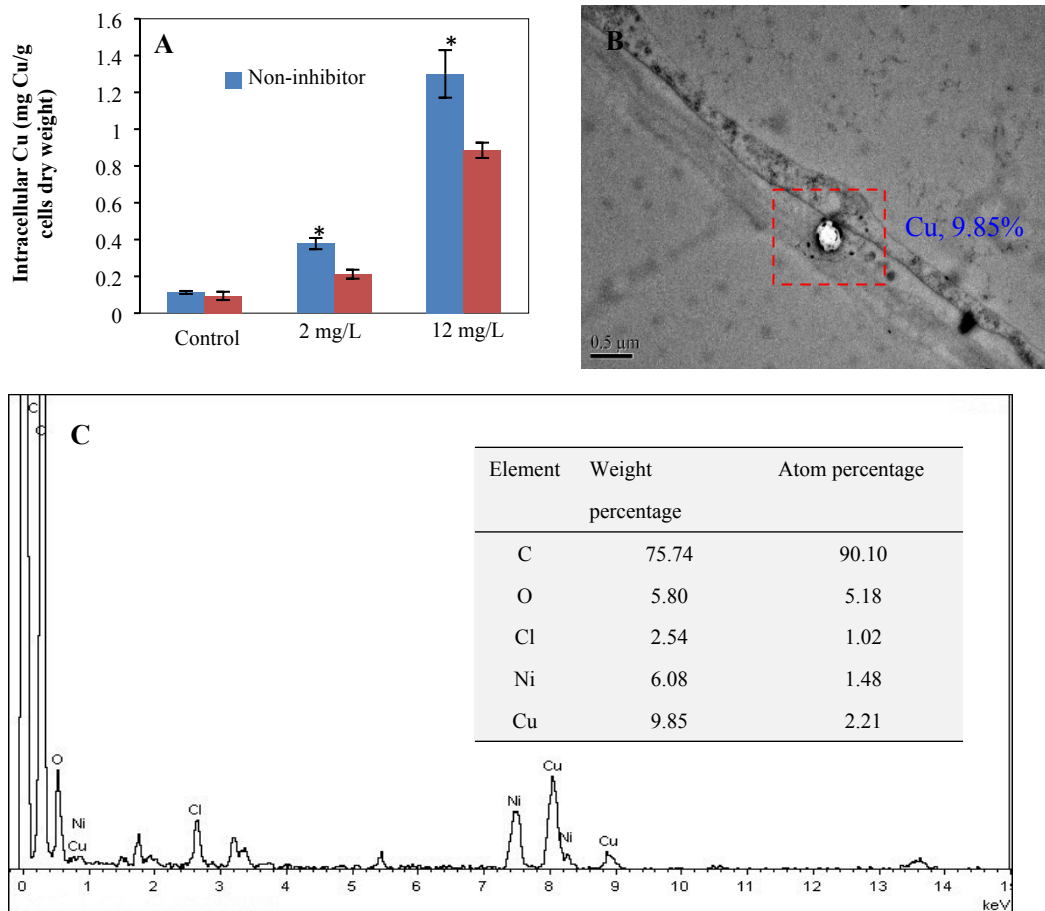

Figure S6. Internalization of CuO NPs by BY-2 cells. (A): Intracellular Cu content with/without the pre-treatment of an endocytosis inhibitor (wortmannin 33  $\mu$ M). After pre-treatment for 30 min, the cells were exposed to CuO NPs (2, 12 mg/L) for 12 h before Cu determination. (B): TEM image of plant cell after exposure to CuO NPs (12 mg/L, 12 h). (C): The elemental composition of vesicle in panel B (as marked with red dashed box) was analyzed with EDS. The insert in panel (C) listed the weight percentage and atom percentage of the detected elements. In panel (A), “\*” indicates significant differences between the “Non-inhibitor” and “Inhibitor” treatments ( $p < 0.05$ , LSD,  $n=3$ ).

115

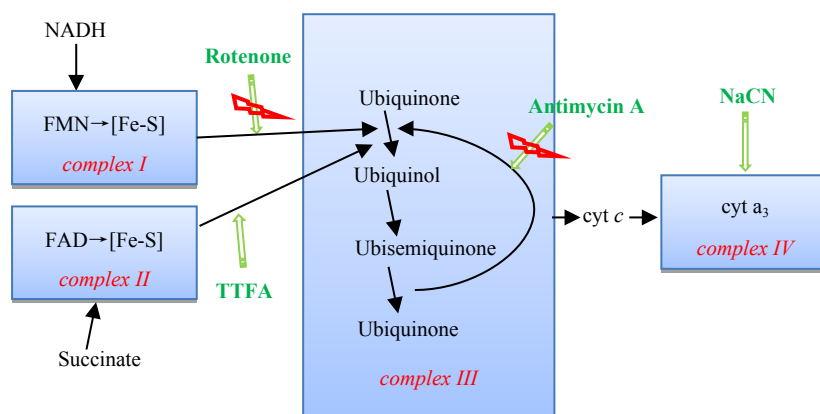

116

117 Figure S7. Schematic diagram of mitochondrial electron transport chain and the target sites of four  
 118 inhibitors (rotenone, TTFA, antimycin A and NaCN) in mitochondria. Rotenone could block the  
 119 transfer of electrons from NADH to ubiquinone. Antimycin A can block electron transfer from  
 120 ubisemiquinone to ubiquinol. TTFA inhibits electron transfer from succinate to ubiquinol. NaCN  
 121 inhibits the oxidation of cyt a<sub>3</sub> by O<sub>2</sub>, which could decrease oxygen production. As indicated in the  
 122 figure, CuO NPs blocked the electron transport from NADH to ubiquinone, and ubisemiquinone to  
 123 ubiquinol. Cyt: cytochrome; TTFA: thenoyltrifluoroacetone; NaCN: sodium cyanide.

124

125

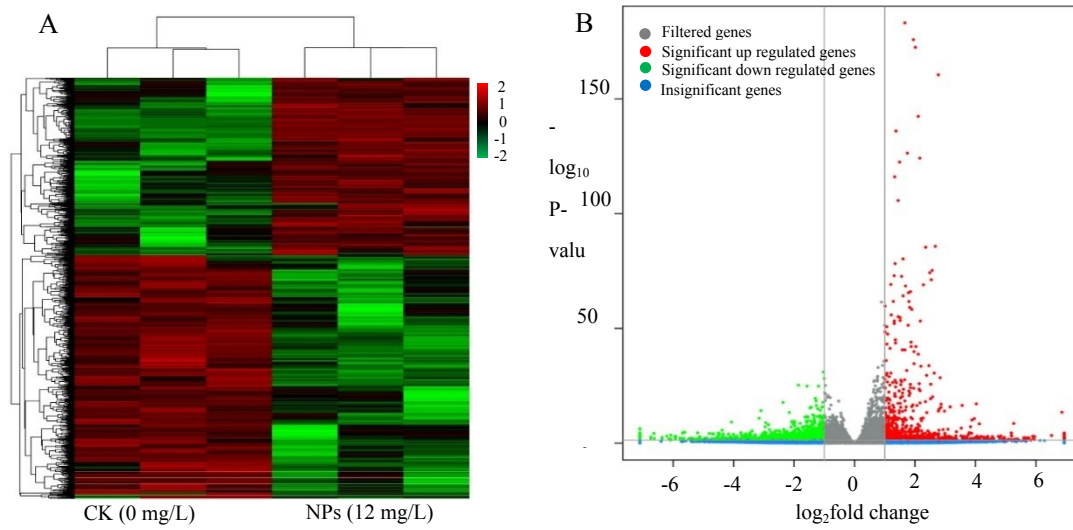

126

127 Figure S8. Hierarchical cluster (A) and volcano plot (B) for differential expression analysis of BY-2  
 128 cells after CuO NPs (0, 12 mg/L) exposure for 4 h. In panels A and B, red and green represent  
 129 significantly up-, and down-regulated genes, respectively ( $P$ -value  $< 0.05$ , fold change  $> 2$ ). In panel  
 130 B, gray represents filtered genes, blue represents insignificantly expressed genes.

131

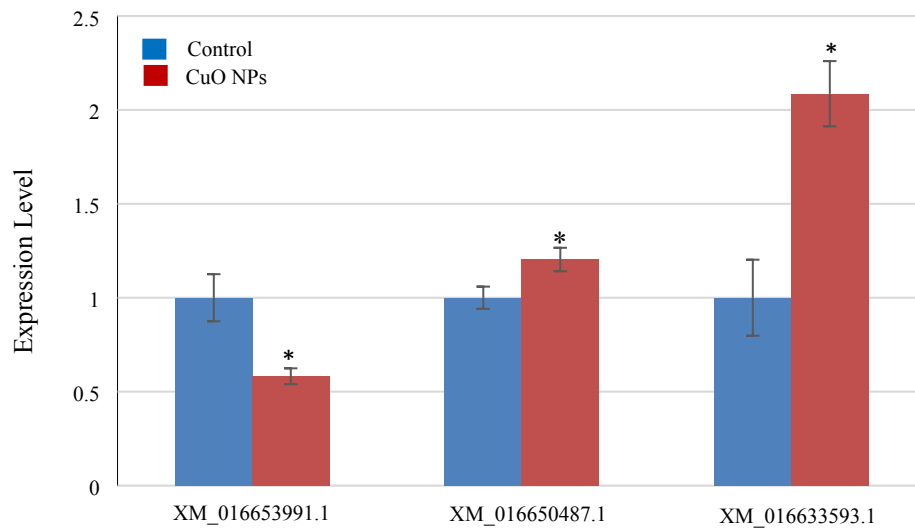

132

133 Figure S9. Expression level of the three selected genes as analyzed using qRT-PCR. The plant cells  
 134 were exposed with CuO NPs (12 mg/L) for 12h. “\*” represents significant difference at  $p < 0.05$ .

135

136

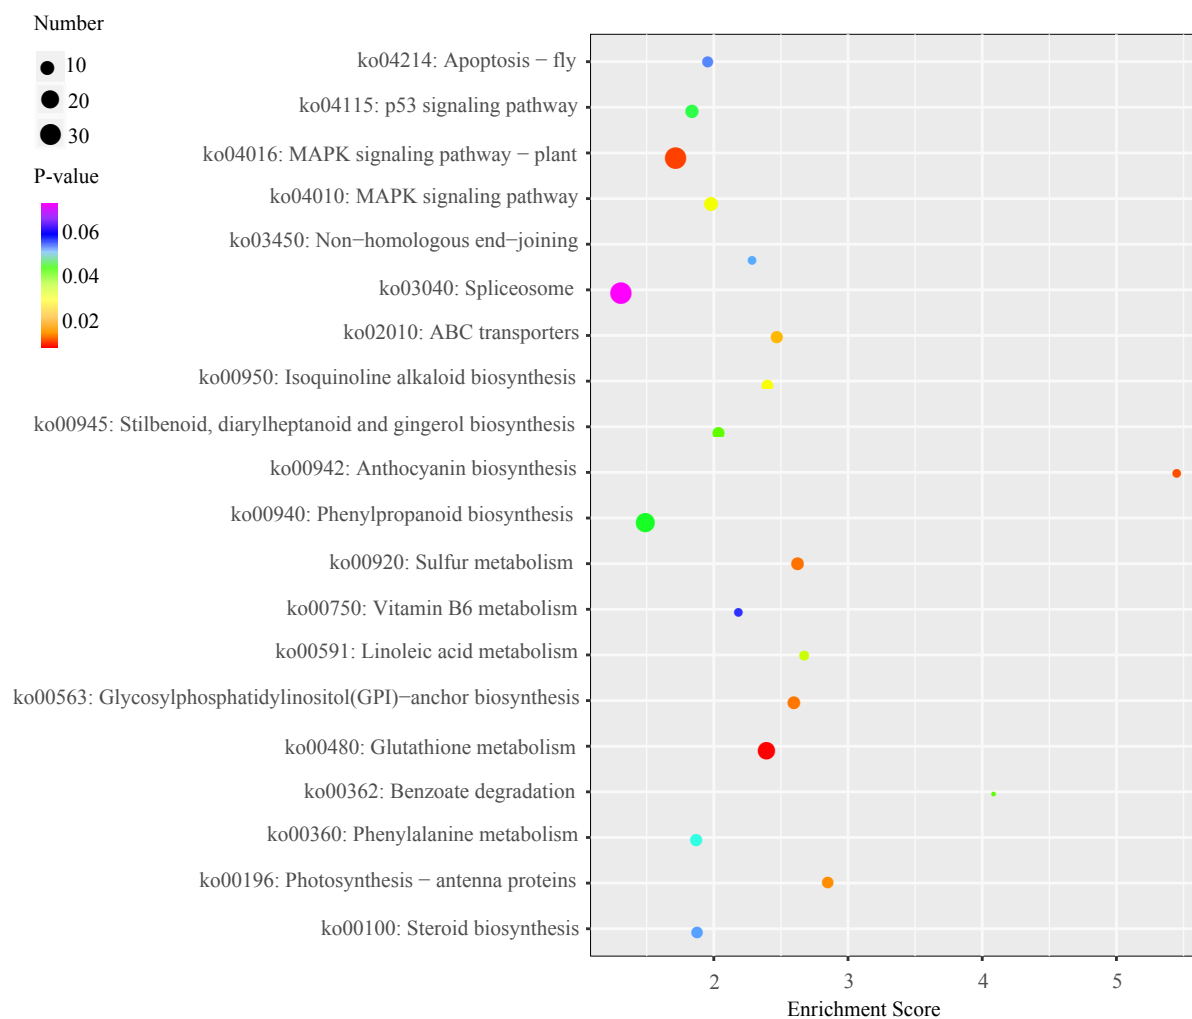

137

138 Figure S10. Bubble chart of the top 20 KEGG pathways. The left Y-axis indicate the KEGG  
 139 pathways, and the X-axis indicate the respective enrichment scores. A high P-value is represented  
 140 by purple, and low P-value is represented by red.

141

142 Table S1. The components of MS and modified MS medium (1/2 MS medium) for tobacco BY-2  
 143 cell culturing.

|                               | Component                                           | MS medium<br>content (mg/L) | Modified MS<br>medium (mg/L) |
|-------------------------------|-----------------------------------------------------|-----------------------------|------------------------------|
| Macronutrients                | NH <sub>4</sub> NO <sub>3</sub>                     | 1650                        | 875                          |
|                               | KH <sub>2</sub> PO <sub>4</sub>                     | 225                         | 112.5                        |
|                               | KNO <sub>3</sub>                                    | 1900                        | 975                          |
|                               | CaCl <sub>2</sub> ·2H <sub>2</sub> O                | 440                         | 220                          |
|                               | MgSO <sub>4</sub> ·7H <sub>2</sub> O                | 370                         | 185                          |
| Micronutrients                | KI                                                  | 0.83                        | 0.415                        |
|                               | H <sub>3</sub> BO <sub>3</sub>                      | 6.2                         | 3.1                          |
|                               | MnSO <sub>4</sub> ·4H <sub>2</sub> O                | 22.3                        | 11.15                        |
|                               | ZnSO <sub>4</sub> ·7H <sub>2</sub> O                | 8.6                         | 4.3                          |
|                               | Na <sub>2</sub> MoO <sub>4</sub> ·2H <sub>2</sub> O | 0.25                        | 0.125                        |
|                               | CuSO <sub>4</sub> ·5H <sub>2</sub> O                | 0.025                       | 0.0125                       |
|                               | CoCl <sub>2</sub> ·6H <sub>2</sub> O                | 0.025                       | 0.0125                       |
| Iron Source                   | EDTANa <sub>2</sub> ·2H <sub>2</sub> O              | 37.3                        | 18.65                        |
|                               | FeSO <sub>4</sub> ·7H <sub>2</sub> O                | 27.8                        | 13.9                         |
| Vitamins and<br>Carbon Source | Myo-inositol                                        | 100                         | 50                           |
|                               | Glycine                                             | 2                           | 1                            |
|                               | Thiamine-HCl                                        | 1                           | 0.5                          |
|                               | Pyridoxine-HCl                                      | 0.5                         | 0.25                         |
|                               | Nicotinic acid                                      | 0.5                         | 0.25                         |
|                               | Sucrose                                             | 30000                       | 15000                        |

144

145

146 Table S2. Results on RNA quality assessment of cells with and without CuO NPs (12 mg/L)  
 147 exposure. The exposure time was 4 h.

| Number | RNA<br>concentration<br>( $\mu\text{g}/\mu\text{L}$ ) | A260/280 <sup>a</sup> | Volume<br>( $\mu\text{L}$ ) | Total yield ( $\mu\text{g}$ ) | RIN  |
|--------|-------------------------------------------------------|-----------------------|-----------------------------|-------------------------------|------|
| CK1    | 0.7071                                                | 2.05                  | 50                          | 35.36                         | 9.8  |
| CK2    | 0.4972                                                | 1.99                  | 50                          | 24.86                         | 10.0 |
| CK3    | 0.6190                                                | 2.06                  | 50                          | 30.95                         | 9.7  |
| NP1    | 0.6894                                                | 2.01                  | 50                          | 34.47                         | 10.0 |
| NP2    | 0.5794                                                | 1.98                  | 50                          | 28.97                         | 10.0 |
| NP3    | 0.7641                                                | 2.03                  | 50                          | 38.21                         | 10.0 |

148 <sup>a</sup>: A260/280 (the ratio of absorbance at 260 and 280 nm) is used to assess the purity of RNA. A ratio range at 1.8-  
 149 2.1 is accepted as “purity” for RNA. “RIN (RNA Integrity Number)  $\geq 7$ ” was used for subsequent gene analysis.  
 150

Table S3. The primer sequences of the three selected genes during qRT-PCR, and the expression level comparison of the three genes between qRT-PCR and RNA-Seq results.

| Transcript -ID ( <i>N. tabacum</i> ) | Forward primer       | Reverse primer        | P-value  | Log <sub>2</sub> fold change (qRT-PCR) | Log <sub>2</sub> fold change (RNA-Seq) |
|--------------------------------------|----------------------|-----------------------|----------|----------------------------------------|----------------------------------------|
| XM_016653991.1                       | CACTGCTCCACGCTAACA   | ATCATTAAGTGCCTCAAGGC  | 1.98E-02 | -0.78                                  | -1.06                                  |
| XM_016650487.1                       | TGGAGCAGACATTGCGAA   | GATTGTGGTACTCTCACTCCT | 1.49E-02 | 0.26                                   | 1.00                                   |
| XM_016633593.1                       | AACCTCATTCTCACTCGTTC | AGACCTTGCCGGACAATA    | 2.2E-03  | 1.06                                   | 2.01                                   |

153

Table S4. Characterization of CuO NPs and BPs

| Particles | Purity (%) | Surface area (m <sup>2</sup> /g) | Size from manufacturer (nm) | Size from TEM (nm) | Zeta potential (mV)                    | Hydrodynamic diameter (nm)             |
|-----------|------------|----------------------------------|-----------------------------|--------------------|----------------------------------------|----------------------------------------|
| CuO NPs   | >99.9      | 12.01                            | <50                         | 30-40              | -11.8 <sup>a</sup> /-29.9 <sup>b</sup> | 238.4 <sup>a</sup> /161.3 <sup>b</sup> |
| CuO BPs   | >99.9      | 0.51                             | 5000                        | 1500-2500          | -14.5 <sup>a</sup> /-15.3 <sup>b</sup> | 2403 <sup>a</sup> /1377 <sup>b</sup>   |

<sup>a</sup> Measured in 1/2 MS medium, the concentrations of CuO NPs and BPs were 12 mg/L.

<sup>b</sup> Measured in ultrapure water, the concentrations of CuO NPs and BPs were 12 mg/L.

157

Table S5. Information of RNA-Seq mapping results for the unexposed and CuO NPs-treated plant cells.

| Sample                           | Software | CK      | CK      | CK      | CuO NPs | CuO NPs | CuO NPs |
|----------------------------------|----------|---------|---------|---------|---------|---------|---------|
| Total reads (M)                  | Tophat   | 5.49    | 5.57    | 4.89    | 5.30    | 6.43    | 5.17    |
|                                  | Bowtie2  | 5.49    | 5.57    | 4.89    | 5.17    | 5.30    | 6.43    |
| Total mapped reads (M)           | Tophat   | 4.82    | 4.96    | 4.35    | 4.72    | 5.70    | 4.59    |
|                                  |          | (87.9%) | (88.9%) | (89.0%) | (88.9%) | (88.6%) | (88.9%) |
|                                  | Bowtie2  | 4.21    | 4.31    | 3.83    | 4.07    | 4.15    | 4.95    |
|                                  |          | (76.8%) | (77.4%) | (78.3%) | (78.7%) | (78.2%) | (76.9%) |
| Reads mapped in proper pairs (M) | Tophat   | 4.18    | 4.33    | 3.77    | 4.05    | 4.83    | 3.97    |
|                                  |          | (76.2%) | (77.8%) | (77.2%) | (76.3%) | (75.1%) | (76.9%) |
|                                  | Bowtie2  | 3.91    | 4.03    | 3.59    | 3.79    | 3.87    | 4.61    |
|                                  |          | (71.2%) | (72.3%) | (73.4%) | (73.3%) | (73.0%) | (71.8%) |

160

161 Table S6. The top 10 GO terms in the category of biological process, cellular component and  
 162 molecular function for the up-regulated genes in BY-2 cells after exposure to CuO NPs (12 mg/L)  
 163 for 4 h.

| GO ID      | GO Term                                           | Category           | Enrichment<br>score | P-value  |
|------------|---------------------------------------------------|--------------------|---------------------|----------|
| GO:0032957 | inositol triphosphate metabolic process           | Biological process | 25.28               | 3.46E-06 |
| GO:0042542 | response to hydrogen peroxide                     | Biological process | 10.11               | 4.05E-05 |
| GO:0009408 | response to heat                                  | Biological process | 5.55                | 9.92E-05 |
| GO:0009693 | ethylene biosynthetic process                     | Biological process | 11.38               | 1.19E-04 |
| GO:0010311 | lateral root formation                            | Biological process | 9.48                | 2.5E-04  |
| GO:0009734 | auxin-activated signaling pathway                 | Biological process | 3.82                | 4.92E-04 |
| GO:0006970 | response to osmotic stress                        | Biological process | 4.97                | 1.22E-03 |
| GO:0010200 | response to chitin                                | Biological process | 4.53                | 1.86E-03 |
| GO:0008152 | metabolic process                                 | Biological process | 4.53                | 1.86E-03 |
| GO:0009611 | response to wounding                              | Biological process | 3.76                | 2.14E-03 |
| GO:0009705 | plant-type vacuole membrane                       | Cellular component | 5.42                | 8.25E-04 |
| GO:0019005 | SCF ubiquitin ligase complex                      | Cellular component | 6.89                | 8.8E-04  |
| GO:0005634 | nucleus                                           | Cellular component | 1.45                | 1.78E-03 |
| GO:0005737 | cytoplasm                                         | Cellular component | 1.49                | 0.021    |
| GO:0005802 | trans-Golgi network                               | Cellular component | 1.59                | 0.120    |
| GO:0005794 | Golgi apparatus                                   | Cellular component | 1.39                | 0.132    |
| GO:0005768 | endosome                                          | Cellular component | 1.52                | 0.136    |
| GO:0005739 | mitochondrion                                     | Cellular component | 1.27                | 0.157    |
| GO:0005887 | integral component of plasma membrane             | Cellular component | 1.32                | 0.192    |
| GO:0048046 | apoplast                                          | Cellular component | 1.22                | 0.230    |
| GO:0016758 | transferase activity, transferring hexosyl groups | Molecular function | 14.22               | 4.66E-05 |
| GO:0016491 | oxidoreductase activity                           | Molecular function | 3.79                | 1.02E-03 |
| GO:0004674 | protein serine/threonine kinase activity          | Molecular function | 2.08                | 6.66E-03 |
| GO:0043565 | sequence-specific DNA binding                     | Molecular function | 2.23                | 0.013    |

|            |                                                  |                    |      |       |
|------------|--------------------------------------------------|--------------------|------|-------|
| GO:0005524 | ATP binding                                      | Molecular function | 1.41 | 0.021 |
| GO:0042802 | identical protein binding                        | Molecular function | 2.77 | 0.023 |
| GO:0030170 | pyridoxal phosphate binding                      | Molecular function | 2.71 | 0.025 |
| GO:0042803 | protein homodimerization activity                | Molecular function | 2.42 | 0.035 |
| GO:0044212 | transcription regulatory region DNA binding      | Molecular function | 2.32 | 0.040 |
| GO:0003700 | transcription factor activity, sequence-specific | Molecular function | 1.44 | 0.057 |
|            | DNA binding                                      |                    |      |       |

164

165

166 Table S7. The top 10 GO terms in the category of biological process, cellular component and  
167 molecular function for the down-regulated genes in BY-2 cells after exposure to CuO NPs (12 mg/L)  
168 for 4 h.

| GO ID      | GO Term                                   | Category           | Enrichment score | P-value  |
|------------|-------------------------------------------|--------------------|------------------|----------|
| GO:0009624 | response to nematode                      | Biological process | 6.61             | 9.66E-05 |
| GO:0009873 | ethylene-activated signaling pathway      | Biological process | 4.06             | 1.53E-04 |
| GO:0009809 | lignin biosynthetic process               | Biological process | 6.32             | 3.85E-04 |
| GO:0006952 | defense response                          | Biological process | 2.31             | 2.17E-03 |
| GO:0042744 | hydrogen peroxide catabolic process       | Biological process | 3.45             | 5.98E-03 |
| GO:0007165 | signal transduction                       | Biological process | 3.48             | 0.010    |
| GO:0006979 | response to oxidative stress              | Biological process | 2.44             | 0.011    |
| GO:0048364 | root development                          | Biological process | 2.71             | 0.016    |
| GO:0006970 | response to osmotic stress                | Biological process | 2.80             | 0.022    |
| GO:0009611 | response to wounding                      | Biological process | 2.25             | 0.032    |
| GO:0031966 | mitochondrial membrane                    | Cellular component | 5.17             | 2.54E-03 |
| GO:0005576 | extracellular region                      | Cellular component | 1.73             | 0.019    |
| GO:0005856 | cytoskeleton                              | Cellular component | 2.37             | 0.038    |
| GO:0009579 | thylakoid                                 | Cellular component | 1.90             | 0.074    |
| GO:0005743 | mitochondrial inner membrane              | Cellular component | 1.71             | 0.099    |
| GO:0005739 | mitochondrion                             | Cellular component | 1.30             | 0.116    |
| GO:0031969 | chloroplast membrane                      | Cellular component | 1.55             | 0.128    |
| GO:0016021 | integral component of membrane            | Cellular component | 1.13             | 0.155    |
| GO:0005886 | plasma membrane                           | Cellular component | 1.12             | 0.231    |
| GO:0009536 | plastid                                   | Cellular component | 1.13             | 0.275    |
| GO:0042409 | caffeoyl-CoA O-methyltransferase activity | Molecular function | 24.38            | 3.1E-06  |
| GO:0052689 | carboxylic ester hydrolase activity       | Molecular function | 7.42             | 6.3E-04  |
| GO:0004674 | protein serine/threonine kinase activity  | Molecular function | 1.84             | 0.011    |
| GO:0003700 | transcription factor activity             | Molecular function | 1.58             | 0.012    |
| GO:0043565 | sequence-specific DNA binding             | Molecular function | 1.91             | 0.025    |

|            |                                             |                    |      |       |
|------------|---------------------------------------------|--------------------|------|-------|
| GO:0016887 | ATPase activity                             | Molecular function | 2.34 | 0.039 |
| GO:0004601 | peroxidase activity                         | Molecular function | 2.13 | 0.052 |
| GO:0004842 | ubiquitin-protein transferase activity      | Molecular function | 1.83 | 0.056 |
| GO:0005215 | transporter activity                        | Molecular function | 2.06 | 0.058 |
| GO:0044212 | transcription regulatory region DNA binding | Molecular function | 1.74 | 0.094 |

169

170

171 Table S8. The genes in the GO terms associated with mitochondria.

| GO ID          | GO Term                                                                     | P-value | Transcript ID<br>( <i>N.tabacum</i> ) | Gene ID<br>( <i>N. tabacum</i> ) | Log <sub>2</sub> fold<br>changes | Sequence<br>matching rate | BLAST e value | Transcript ID<br>( <i>Arabidopsis</i> ) | Gene Name<br>( <i>Arabidopsis</i> ) |
|----------------|-----------------------------------------------------------------------------|---------|---------------------------------------|----------------------------------|----------------------------------|---------------------------|---------------|-----------------------------------------|-------------------------------------|
| GO:<br>0031966 | mitochondrial membrane                                                      | 0.018   | XM_016655108.1                        | LOC107827888                     | -3.85                            | 76.54                     | 1E-153        | AT1G34065.1                             | SAMC2                               |
|                |                                                                             |         | XM_016658402.1                        | LOC107830762                     | -3.98                            | 69.2                      | 6E-57         | AT3G17611.2                             | ATRBL14                             |
|                |                                                                             |         | XM_016660535.1                        | LOC107832675                     | -1.10                            | 70.81                     | 2E-77         | AT3G28580.1                             | NN                                  |
| GO:<br>0005743 | mitochondrial inner membrane                                                | 0.088   | XM_016634074.1                        | LOC107809440                     | -1.48                            | 69.97                     | 3E-66         | AT5G19630.1                             | NN                                  |
|                |                                                                             |         | XM_016645539.1                        | LOC107819429                     | -1.42                            | 76.49                     | 2E-72         | AT1G02410.1                             | COX11                               |
|                |                                                                             |         | XM_016659246.1                        | LOC107831479                     | +0                               | —                         | —             | —                                       | NN                                  |
| GO:<br>0005739 | mitochondrion                                                               | 0.075   | XM_016580765.1                        | LOC107762408                     | -1.13                            | 70.12                     | 3E-125        | AT3G25210.1                             | NN                                  |
|                |                                                                             |         | XM_016625037.1                        | LOC107801659                     | -2.72                            | 72.52                     | 0             | AT5G22800.1                             | EMB86                               |
|                |                                                                             |         | XM_016637446.1                        | LOC107812378                     | -1.43                            | 64.95                     | 5E-29         | AT1G43980.1                             | PCMP-E58                            |
|                |                                                                             |         | XM_016641052.1                        | LOC107815466                     | -1.58                            | 74.85                     | 0             | AT4G17740.2                             | CTPA2                               |
|                |                                                                             |         | XM_016641384.1                        | LOC107815753                     | -4.62                            | 70.73                     | 0             | AT5G14220.1                             | PPOX2                               |
|                |                                                                             |         | XM_016645539.1                        | LOC107819429                     | -1.42                            | 76.49                     | 2E-72         | AT1G02410.1                             | COX11                               |
|                |                                                                             |         | XM_016653798.1                        | LOC107826771                     | -1.83                            | 70.11                     | 4E-136        | AT1G71060.1                             | NN                                  |
|                |                                                                             |         | XM_016653991.1                        | LOC107826946                     | -1.06                            | 79.56                     | 1E-171        | AT3G27380.2                             | SDH2-1                              |
|                |                                                                             |         | XM_016655108.1                        | LOC107827888                     | -3.85                            | 76.54                     | 1E-153        | AT1G34065.1                             | SAMC2                               |
|                |                                                                             |         | XM_016655916.1                        | LOC107828574                     | -2.45                            | 67.42                     | 6E-167        | AT1G53600.1                             | PCMP-E63                            |
|                |                                                                             |         | XM_016656504.1                        | LOC107829073                     | -1.80                            | —                         | —             | —                                       | NN                                  |
|                |                                                                             |         | XM_016658711.1                        | LOC107830996                     | -1.30                            | 80                        | 5E-09         | AT1G50270.1                             | PCMP-E42                            |
|                |                                                                             |         | XM_016659246.1                        | LOC107831479                     | +0                               | —                         | —             | —                                       | NN                                  |
|                |                                                                             |         | XM_016659608.1                        | LOC107831816                     | -1.11                            | 72.38                     | 0             | AT5G57480.1                             | NN                                  |
|                |                                                                             |         | XM_016660535.1                        | LOC107832675                     | -1.10                            | 70.81                     | 2E-77         | AT3G28580.1                             | NN                                  |
| GO:<br>0070469 | respiratory chain                                                           | 0.1026  | XM_016634074.1                        | LOC107809440                     | -1.48                            | 69.97                     | 3E-66         | AT5G19630.1                             | NN                                  |
| GO:<br>0005749 | mitochondrial respiratory chain complex II, succinate dehydrogenase complex | 0.003   | XM_016653991.1                        | LOC107826946                     | -1.06                            | 79.56                     | 1E-171        | AT3G27380.2                             | SDH2-1                              |

|              |                            |               |        |                |                |              |       |        |             |             |       |
|--------------|----------------------------|---------------|--------|----------------|----------------|--------------|-------|--------|-------------|-------------|-------|
| (ubiquinone) |                            |               |        |                |                |              |       |        |             |             |       |
| GO:          | NADH                       | dehydrogenase | 0.043  | XM_016634074.1 | LOC107809440   | -1.48        | 69.97 | 3E-66  | AT5G19630.1 | NN          |       |
| 0008137      | (ubiquinone) activity      |               |        |                |                |              |       |        |             |             |       |
| GO:          | NAD(P)H                    | dehydrogenase | 0.0009 | XM_016637993.1 | LOC107812824   | -2.88        | 72.92 | 4E-24  | AT5G39210.1 | CRR7        |       |
| 0010275      | complex assembly           |               |        |                |                |              |       |        |             |             |       |
| GO:          | mitochondrial              | respiratory   | 0.0003 | XM_016659608.1 | LOC107831816   | -1.11        | 72.38 | 0      | AT5G57480.1 | NN          |       |
| 0034551      | chain complex III assembly |               |        |                |                |              |       |        |             |             |       |
| GO:          | NAD binding                |               | 0.0003 | XM_016660215.1 | LOC107832374   | -1.06        | 75.36 | 0      | AT1G79750.1 | NADP-ME     |       |
| 0051287      |                            |               |        |                |                |              |       |        |             |             |       |
| GO:          | respiratory chain          |               | 0.1026 | XM_016634074.1 | LOC107809440   | -1.48        | 69.97 | 3E-66  | AT5G19630.1 | NN          |       |
| 0070469      |                            |               |        |                |                |              |       |        |             |             |       |
| GO:          | mitochondrion              |               | 0.157  | XM_016580880.1 | LOC107762521   | 1.06         | 79.53 | 0      | AT3G12580.1 | MED37C      |       |
| 0005739      |                            |               |        | XM_016596624.1 | LOC107776706   | 0/+          | 71.25 | 9E-113 | AT4G25290.1 | NN          |       |
|              |                            |               |        | XM_016612125.1 | LOC107790219   | 1.79         | 66.77 | 2E-64  | AT5G38710.1 | POX2        |       |
|              |                            |               |        | XM_016628836.1 | LOC107804891   | 1.46         | 73.42 | 0      | AT3G46100.1 | ATHRS1      |       |
|              |                            |               |        | XM_016633593.1 | LOC107809014   | 2.01         | 80.03 | 0      | AT1G15690.1 | AVP1        |       |
|              |                            |               |        | XM_016634294.1 | LOC107809633   | 2.63         | —     | —      | —           | NN          |       |
|              |                            |               |        | XM_016640170.1 | LOC107814719   | 2.02         | —     | —      | —           | NN          |       |
|              |                            |               |        | XM_016641568.1 | LOC107815875   | 2.21         | 67.95 | 2E-118 | AT1G07590.1 | NN          |       |
|              |                            |               |        | XM_016653973.1 | LOC107826927   | 2.21         | 68.61 | 1E-78  | AT4G27940.1 | MTM1        |       |
|              |                            |               |        | XM_016655266.1 | LOC107828015   | 1.18         | 72.96 | 0      | AT2G38400.1 | AGT3        |       |
|              |                            |               |        | XM_016660604.1 | LOC107832733   | 5.59         | 65.2  | 4E-58  | AT5G57250.1 | NN          |       |
| GO:          | protein                    | import        | into   | 0.0001         | XM_016650487.1 | LOC107823778 | 1.00  | 71.38  | 0           | AT2G29080.1 | FTSH3 |
| 0045041      | mitochondrial              |               |        |                |                |              |       |        |             |             |       |
|              | intermembrane space        |               |        |                |                |              |       |        |             |             |       |

172 “—” indicated that this gene cannot match to that of *Arabidopsis*. Sequence matching rate of BY-2 cells in this work was matched

173 with that of *Arabidopsis*.

174 “NN” in the last column indicates “No Name” of this gene was found from the genome of *Arabidopsis*

175 (<http://www.arabidopsis.org>).

176 “+/0” means the gene only expressed in the unexposed cells, and this gene in the CuO NPs-treated cells was down-regulated.  
177 “0/+” means the gene only expressed in the CuO NPs-treated cells, and this gene was up-regulated because it was not expressed in  
178 the unexposed cells.  
179  
180

181 Table S9. The genes that belong to glutathione metabolism in KEGG pathway analysis.

| Transcript ID ( <i>N.</i><br><i>tabacum</i> ) | Gene ID<br>( <i>N. tabacum</i> ) | Log <sub>2</sub> fold<br>change | Sequence<br>matching rate | BLAST e<br>value | Transcript ID<br>( <i>Arabidopsis</i> ) | Gene Name<br>( <i>Arabidopsis</i> ) |
|-----------------------------------------------|----------------------------------|---------------------------------|---------------------------|------------------|-----------------------------------------|-------------------------------------|
| XM_016578004.1                                | LOC107759987                     | 1.31                            | 70.77                     | 3.00E-77         | AT5G02780.1                             | GSTL1                               |
| XM_016578005.1                                | LOC107759987                     | 1.12                            | 70.77                     | 3.00E-77         | AT5G02780.1                             | GSTL1                               |
| XM_016589828.1                                | LOC107770509                     | 1.77                            | 71.56                     | 1.00E-83         | AT5G02790.1                             | GSTL3                               |
| XM_016599675.1                                | LOC107779283                     | 1.12                            | 67.77                     | 9.00E-39         | AT1G02920.1                             | GSTF7                               |
| XM_016600186.1                                | LOC107779712                     | -3.70                           | 69.9                      | 3.00E-26         | AT2G29450.1                             | GSTU5                               |
| XM_016600476.1                                | LOC107779974                     | 1.42                            | 70.39                     | 2.00E-82         | AT4G32320.1                             | APX6                                |
| XM_016603912.1                                | LOC107782951                     | 1.66                            | 73.42                     | 3.00E-108        | AT1G78380.1                             | GSTU19                              |
| XM_016603942.1                                | LOC107782987                     | 1.48                            | 72.98                     | 9.00E-39         | AT2G29420.1                             | GSTU7                               |
| XM_016605205.1                                | LOC107784134                     | -1.09                           | 66.14                     | 1.00E-44         | AT4G39640.2                             | GGT1                                |
| XM_016611777.1                                | LOC107789895                     | 1.74                            | 66.67                     | 1.00E-24         | AT3G09270.1                             | GSTU8                               |
| XM_016617453.1                                | LOC107794892                     | -1.57                           | 77.55                     | 0                | AT5G35790.1                             | APG1                                |
| XM_016617761.1                                | LOC107795177                     | 1.20                            | 81.25                     | 1.00E-31         | AT1G02920.1                             | GSTF7                               |
| XM_016621022.1                                | LOC107798067                     | 1.53                            | 68.9                      | 3.00E-26         | AT2G29420.1                             | GSTU7                               |
| XM_016624113.1                                | LOC107800866                     | 1.60                            | 69.9                      | 3.00E-26         | AT2G29450.1                             | GSTU5                               |
| XM_016641574.1                                | LOC107815922                     | -1.39                           | —                         | —                | —                                       | NN                                  |
| XM_016650661.1                                | LOC107823949                     | 1.37                            | 72.86                     | 3.00E-102        | AT1G78380.1                             | GSTU19                              |
| XM_016659023.1                                | LOC107831268                     | 1.16                            | 67                        | 1.00E-24         | AT3G09270.1                             | GSTU8                               |
| XM_016660621.1                                | LOC107832748                     | 1.01                            | 71.22                     | 0                | AT5G27380.1                             | GSH2                                |
| XM_016640514.1                                | LOC107815009                     | -1.63                           | 69.53                     | 1.00E-16         | AT2G29420.1                             | GSTU7                               |

182 “—” indicated that this gene cannot match to that of *Arabidopsis*. Sequence matching rate of BY-2 cells in this work was matched

183 with that of *Arabidopsis*.

184 “NN” in the last column indicates “No Name” of this gene was found from the genome of *Arabidopsis*

185 (<http://www.arabidopsis.org>).
